# Supplementary material
Source: publisher site journal article supplement (https://www.dovepress.com/article/359983)
Supplement: Supplementary file 1 [file get_supplementary_file.php]

Supplementary Material

Appendix A

Please carefully read each prompt related to preventing COVID-19 and indicate the appropriate response. During the peak time of time of COVID-19...

|  | Strongly disagree | disagree | Neutral | Agree | Strongly agree |
| --- | --- | --- | --- | --- | --- |
| Attitudes |  |  |  |  |  |
| 1 Staying at home is a good idea. | 1 | 2 | 3 | 4 | 5 |
| 2 I prefer to stay at home. | 1 | 2 | 3 | 4 | 5 |
| 3 Staying at home is a wise idea. | 1 | 2 | 3 | 4 | 5 |
| Subjective norms |  |  |  |  |  |
| 4 My family members and peers think that I should stay at home. | 1 | 2 | 3 | 4 | 5 |
| 5 The authorities (e.g., governors, professionals) think that I should stay at home. | 1 | 2 | 3 | 4 | 5 |
| Perceived behavioral control |  |  |  |  |  |
| 6 I can stay at home if I want to. | 1 | 2 | 3 | 4 | 5 |
| 7 I am confident that I have the ability to stay at home. | 1 | 2 | 3 | 4 | 5 |
| 8 It is easy for me to stay at home. | 1 | 2 | 3 | 4 | 5 |
| 9 I have the resources and the knowledge to stay at home. | 1 | 2 | 3 | 4 | 5 |
| Intention |  |  |  |  |  |
| 10 I will always stay at home except for essential activities. | 1 | 2 | 3 | 4 | 5 |
| 11 I will recommend others to stay at home. | 1 | 2 | 3 | 4 | 5 |
| 12 I will continue staying at home. | 1 | 2 | 3 | 4 | 5 |

Please carefully read each prompt related to preventing COVID-19 and indicate the appropriate response.

| Questionnaire of behavioral outcomes |  |  |  |  |  |  |  |
| --- | --- | --- | --- | --- | --- | --- | --- |
| 14 How many hours did you go outside each week during the peak time of COVID-19? | Not at all | Less than once a week | About once a week | 2-3 times a week | 4-5 times a week | About once a day | Several times each day |
| 15 How frequently did you go outside during the peak time of COVID-19? | Not at all | < 1h | 1-4 h | 4-7 h | 7-10 h | 10-14 h | > 14 h |
| 14 How many hours did you go outside each week during the peak time of COVID-19? | Never | Hardly ever | Seldom | Sometimes | Often | Usually | Always |
